# Supplementary material for: Aspergillus oryzae PrtR alters transcription of individual peptidase genes in response to the growth environment
Source: Springer Nature journal article supplement (doi:10.1007/s00253-023-12833-5), 2024-01-10
Supplement: 253_2023_12833_MOESM1_ESM.pdf [file 253_2023_12833_MOESM1_ESM.pdf]

## Supplemental Material

Journal name:

Applied Microbiology and Biotechnology

Manuscript Title:

*Aspergillus oryzae* PrtR alters transcription of individual peptidase genes in response to the growth environment

The name(s) of the author(s):

Rika Numazawa<sup>1</sup>, Yukako Tanaka<sup>2</sup>, Sawako Nishioka<sup>2</sup>, Ryotaro Tsuji<sup>2</sup>, Hiroshi Maeda<sup>2</sup>, Mizuki Tanaka<sup>1,2</sup>, Youhei Yamagata<sup>1,2\*</sup>

The affiliation(s) and address(es) of the author(s):

<sup>1</sup> Department of Applied Biological Science, United Graduate School of Agricultural Science, Tokyo University of Agriculture and Technology, 3-5-8 Saiwai-cho, Fuchu, Tokyo 1838509, Japan

<sup>2</sup> Department of Applied Biological Chemistry, Graduate School of Agriculture, Tokyo University of Agriculture and Technology, 3-5-8 Saiwai-cho, Fuchu, Tokyo 1838509, Japan

The e-mail address, telephone and fax numbers of the corresponding author:

E-mail: y-yama@cc.tuat.ac.jp; Phone: +81 423675706; Fax: 81 423675706

Table S1 Nucleotide sequences of primers used in this study.

| Primer name                             | Sequence (5' to 3')            |
|-----------------------------------------|--------------------------------|
| <i>For deletion mutant construction</i> |                                |
| prtR_5'_F                               | TGATAAGAATGGCGATACTGCAGACTAC   |
| prtR_3'_R                               | CAACTTGGCTGATCGATGATACTTACG    |
| prtR_3'_F                               | GAATAATCGGCGAGTAGAACAAGCTG     |
| prtR_5'_R                               | GTATATCCTATATTCAATCACGCGCCAGAC |
| creloxp_F                               | ATCGCTGGATCAACGCTGGGATCAC      |
| creloxp_R                               | TGTAAAACGACGGCCAGTGCCAAGC      |
| pyrG_Fw                                 | GGTAATGTGCCCCAGGCTTGTCAG       |
| pyrG_Rv                                 | GGCCCGAGAGGACTATTCCGAG         |
| creloxp_5'_F                            | CCTCATATGGAAGAACGTCAGACGTGAC   |
| creloxp_3'_R                            | GGTACCCCTCGAAACATAACTTCGTATA   |
| prtR_up2049_F                           | CATCCGGGCCGCGAATGATATGATATC    |
| prtR_up967_R                            | GCATAGTGGCATGATAGCGTTCTGCC     |
| prtR_down97_F                           | GGATATACGATATGTCTCCCCGTAC      |
| prtR_down1045_R                         | GGGTGGAGAGTATATGATGGTACTGC     |
| ligD_up_F                               | GAGAAGCCCTGTCGCACTTTATCGG      |
| ligD_up_R                               | CAATCACACGCGCTATTACGCCAC       |
| ligD_down_F                             | TTAAGGAGTCCGCAGCTGAAGATGG      |
| ligD_down_R                             | GCCTAGAAGGGTTCATTGTGCTGC       |
| <i>For quantitative RT-qPCR</i>         |                                |
| prtR-RT-F                               | GTTCTCAATGCTCGTTCGGA           |
| prtR-RT-R                               | GAAATGAGTGTGGCATGACCTC         |
| actA-RT-F                               | TCATGAAGTGTGATGTTGATGTCC       |
| actA-RT-R                               | GGCAAGGGCGGTGATTTTC            |
| pepO-RT-F                               | CTCCTATGACTTCGGCTTCATC         |
| pepO-RT-R                               | GCCCTTTCCGACAGAGTAACC          |
| pepO2-RT-F                              | CGATGGTAGTGGGTCTGGTG           |
| pepO2-RT-R                              | CCCGCTGTTGAAAGGATTG            |
| pepO3-RT-F                              | CGATCACGACAAATACCAGG           |
| pepO3-RT-R                              | ATCTCCATCCGCAACAGC             |
| pepO4-RT-F                              | GAATACTAGAGACGACCGAGAAC        |
| pepO4-RT-R                              | CACAATAACGCACAGCATCC           |

Table S1 Nucleotide sequences of primers used in this study (continued).

| Primer name | Sequence (5' to 3')     |
|-------------|-------------------------|
| pepO5-RT-F  | CGACACCGGAAACGAATTCTC   |
| pepO5-RT-R  | CCCACAACCACACCAAACAC    |
| alpA-RT-F   | CTTTCTGCCTGGATTGGCTC    |
| alpA-RT-R   | CAACTCCTTGATGCGCTTGG    |
| aorA-RT-F   | TTCGGGTGGTGGCTTCAG      |
| aorA-RT-R   | ATGGATAGGGAGGGTTGTGG    |
| aorB-RT-F   | CGAAGAACAAGCAACGACCAG   |
| aorB-RT-R   | CGCTTTCGTAGTAGGGATAGG   |
| deuA-RT-F   | CGCCAACTGCGACATCTAC     |
| deuA-RT-R   | CATAGCCGTAGCCCAAGTCC    |
| deuB-RT-F   | CGCCAACTGCGACATCTAC     |
| deuB-RT-R   | CATAGCCGTAGCCCAAGTCC    |
| np1-RT-F    | CATCCGTGCTTACCCATTCTC   |
| np1-RT-R    | CCTTGAACTCGGGCTTTG      |
| np3-RT-F    | ACGGAATGGGAATGTGGGTTT   |
| np3-RT-R    | CAGGGATGTGTAGTTCAGTGGGT |
| pipA-RT-F   | ATCTCCATCCGCAACAGC      |
| pipA-RT-R   | AGCAGGCGTGACCAACAAG     |
| pipC-RT-F   | AAAGGAACGAGCGACAAGAAAG  |
| pipC-RT-R   | AGACTGTCACTGCTCCTGAG    |
| ocpO-RT-F   | CTACTTCAACCGCACTGACG    |
| ocpO-RT-R   | GTTCGTCCGCTCAATCACAC    |
| cpl-RT-F    | AGTCCCATACTACCAGCCCATC  |
| cpl-RT-R    | GCCGTTCCATTCGTCTTGTAGC  |
| ocpA-RT-F   | GAAGCAGGTAGTCAGAAAGGTG  |
| ocpA-RT-R   | CGATGAGTTGTCTGTAGGTGTTG |
| ocpB-RT-F   | GAGCAGAACAACACATTTTACG  |
| ocpB-RT-R   | CGTTTTCGGTGGTATTGGC     |
| ocpC-RT-F   | TTCCACAAGCACCATCACTC    |
| ocpC-RT-R   | CAACACCCTCGCTCCATTC     |
| ocpD-RT-F   | GACGAGTGGACCGAAGGATAC   |
| ocpD-RT-R   | AACATTCCCAGCCACAACCC    |

Table S1 Nucleotide sequences of primers used in this study (continued).

| Primer name | Sequence (5' to 3')        |
|-------------|----------------------------|
| ocpE-RT-F   | AGGAAATCTCCAAGGTCGCC       |
| ocpE-RT-R   | CGTGTCCAGCCTCCCAAAC        |
| ocpG-RT-F   | ACGGCTTTATTGGCCATCTC       |
| ocpG-RT-R   | TCTAGGACCGAGGGTTCGTG       |
| ocpH-RT-F   | GCCCACAGCATTCAACTACC       |
| ocpH-RT-R   | AACAACCTGACCAAGTGACG       |
| ocpJ-RT-F   | GACTTATCATCTCTTTTGGGGC     |
| ocpJ -RT-R  | CAACAACATCACGCACATAAGC     |
| sep1-RT-F   | ATCCATCTCCAGTGATGAGGATTCCG |
| sep1-RT-R   | AATAACCCCATTCAGTGCAAACCTG  |
| dppB-RT-F   | CCTGTTTCTGACTGGCGTTTC      |
| dppB-RT-R   | CTCGTAGCCCTCCTCATTGGTC     |
| dppE-RT-F   | CAAACGGCACAGCATAACAACGAAG  |
| dppE-RT-R   | CGGCATTGAATCGGGTGGTG       |
| dppF-RT-F   | CATGAGCTTGGTCGCCGATTC      |
| dppF-RT-R   | GCTCCTCAGTGCTCAACAGAG      |
| tppA-RT-F   | ATTGGCTTGATGGGTCTGCG       |
| tppA-RT-R   | AGTCTCGGTGCCGTCGTTAG       |
| tppB-RT-F   | ATGACCAACGACGGCACCAAC      |
| tppB-RT-R   | AGAAACCGCCCGAGGAGAAG       |
| tppC-RT-F   | CCAAATGGGAAGGGCTCTACAAC    |
| tppC-RT-R   | ACAATACCAGCAAACACAGGCG     |

Table S2 Peptidase genes whose transcription were analyzed in this study.

| Types of peptidases                      | Gene name                          | AO number                                 |                |
|------------------------------------------|------------------------------------|-------------------------------------------|----------------|
| Endo peptidases                          | <i>pepO</i>                        | AO090120000474                            |                |
|                                          | Aspartic endopeptidases<br>(APase) | <i>pepO2</i>                              | AO090012000667 |
|                                          |                                    | <i>pepO3</i>                              | AO090012000209 |
|                                          |                                    | <i>pepO4</i>                              | AO090009000228 |
|                                          |                                    | <i>pepO5</i>                              | AO090010000644 |
|                                          |                                    | <i>alpA</i>                               | AO090003001036 |
|                                          | Serine endopeptidases              | <i>aorA</i>                               | AO090026000083 |
|                                          |                                    | <i>aorB</i>                               | AO090023000263 |
|                                          |                                    | <i>deuA</i>                               | AO090010000493 |
|                                          | Metallo endopeptidases             | <i>deuB</i>                               | AO090001000135 |
|                                          |                                    | <i>np1</i>                                | AO090011000036 |
|                                          |                                    | <i>np3</i>                                | AO090138000160 |
|                                          |                                    | Glutamate endopeptidases                  | <i>pipA</i>    |
|                                          | <i>pipC</i>                        |                                           | AO090010000100 |
|                                          | Exo peptidases                     | <i>ocpO</i>                               | AO090020000351 |
| <i>cpl</i>                               |                                    | AO090103000026                            |                |
| <i>ocpA</i>                              |                                    | AO090012000706                            |                |
| <i>ocpB</i>                              |                                    | AO090701000220                            |                |
| Serine-type<br>carboxypeptidases (CPase) |                                    | <i>ocpC</i>                               | AO090103000153 |
|                                          |                                    | <i>ocpD</i>                               | AO090023000382 |
|                                          |                                    | <i>ocpE</i>                               | AO090026000680 |
|                                          |                                    | <i>ocpG</i>                               | AO090120000232 |
|                                          |                                    | <i>ocpH</i>                               | AO090010000534 |
|                                          |                                    | <i>ocpJ</i>                               | AO090023000848 |
|                                          |                                    | Putative serine-type<br>carboxypeptidases | <i>sepl</i>    |
| Dipeptidyl-peptidases                    |                                    | <i>dppB</i>                               | AO090023000602 |
|                                          |                                    | <i>dppE</i>                               | AO070340000111 |
|                                          |                                    | <i>dppF</i>                               | AO090005000697 |
| Tripeptidyl-peptidases                   |                                    | <i>tppA</i>                               | AO090166000084 |
|                                          | <i>tppB</i>                        | AO090011000235                            |                |
|                                          | <i>tppC</i>                        | AO090005001380                            |                |

# Supplemental Material

**A**

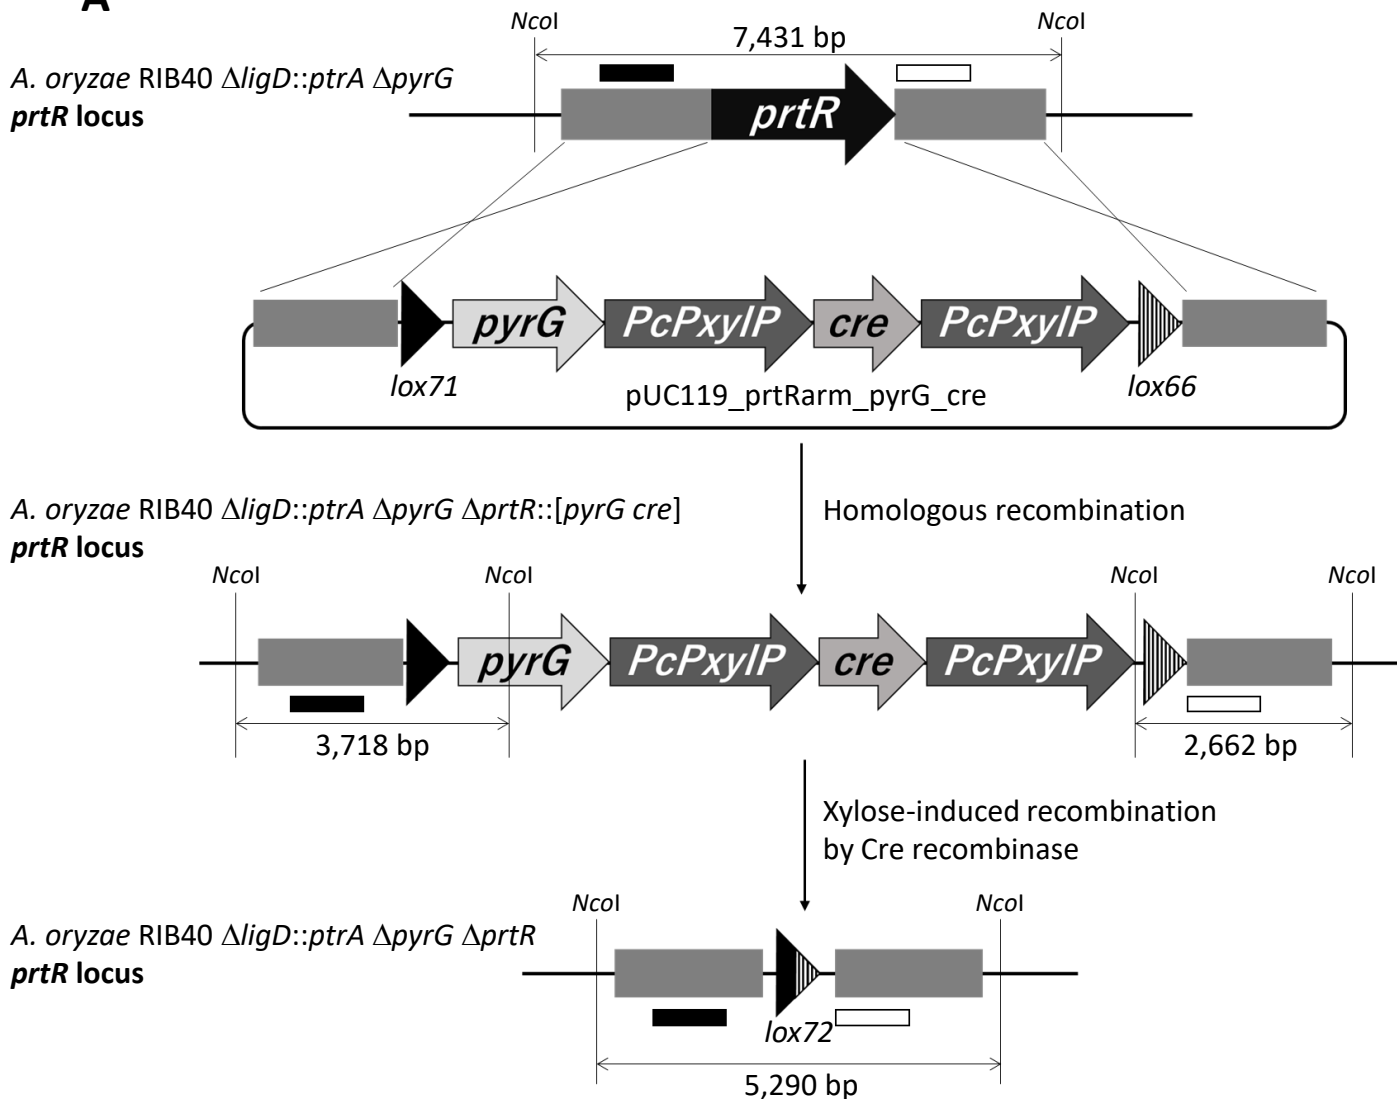

**B**

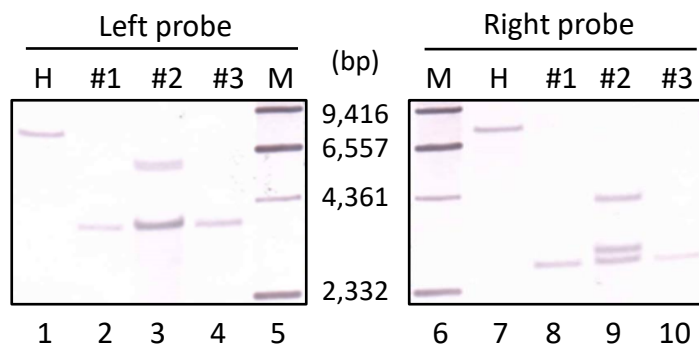

**C**

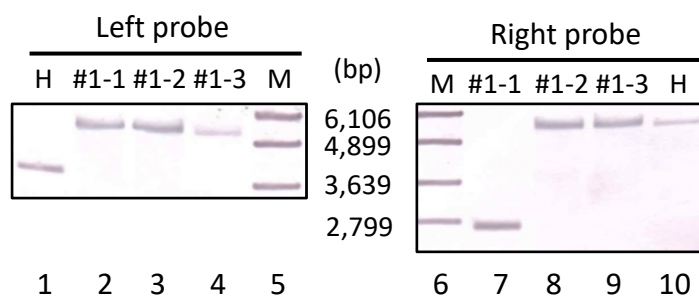

Fig. S1 (continued)

**D**

*A. oryzae* RIB40  $\Delta ligD::ptrA \Delta pyrG \Delta prtR$   
**ligD locus**

or

*A. oryzae* RIB40  $\Delta ligD::ptrA \Delta pyrG$   
**ligD locus**

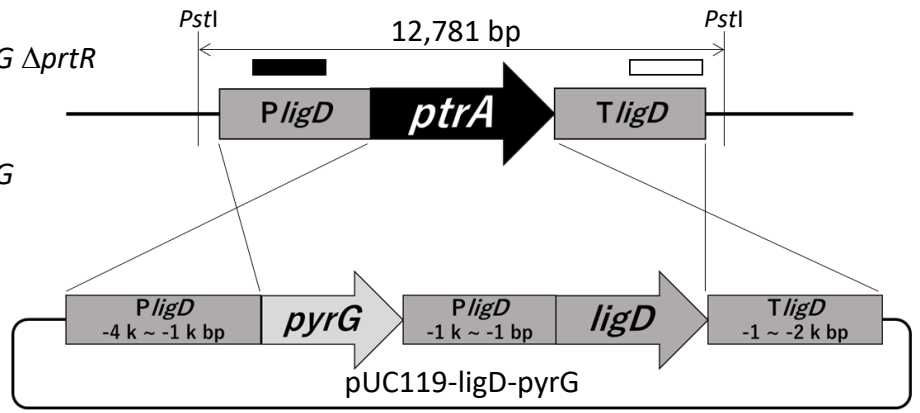

*A. oryzae* RIB40  
 $\Delta ligD::[pyrG ligD] \Delta pyrG \Delta prtR$   
**ligD locus**

or

*A. oryzae* RIB40  
 $\Delta ligD::[pyrG ligD] \Delta pyrG$   
**ligD locus**

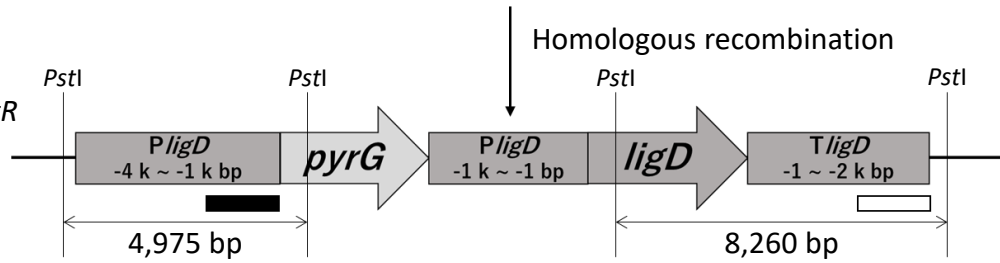**E**

Left probe

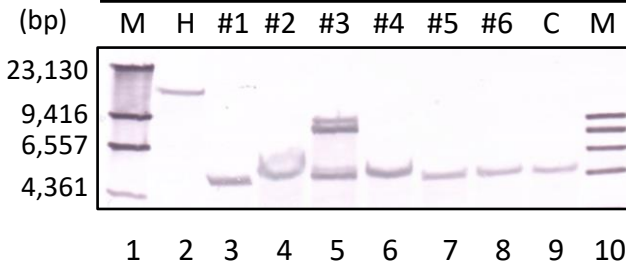

Right probe

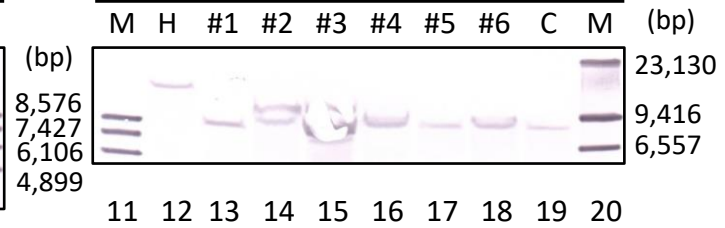

Fig. S1 (continued)

## Fig. S1 Summary of $\Delta$ prtR construction and confirmation of the mutant strains by Southern blotting. (continued)

- A) Schematic presentation of *prtR* gene deletion. The *prtR* gene of the host strain ( $\Delta$ *ligD*::*ptrA*  $\Delta$ *pyrG*) was replaced by a DNA fragment carrying the *pyrG* gene and the Cre-*loxP* system in pUC119\_prtRarm\_pyrG\_cre. The obtained strain was designated as  $\Delta$ *ligD*::*ptrA*  $\Delta$ *pyrG*  $\Delta$ *prtR*::[*pyrG cre*]. Then, the expression of Cre-*loxP* system was induced in the induction medium containing xylose, and the DNA fragment containing the *pyrG* gene was removed by loop-out. The resulting strain was named  $\Delta$ *ligD*  $\Delta$ *pyrG*  $\Delta$ *prtR*. The genomic DNAs of the mutant strains were digested with *NcoI* and the target DNA fragment was detected using two probes, the left probe (black box) and the right probe (open box), respectively.
- B) Southern blot analysis of  $\Delta$ *ligD*::*ptrA*  $\Delta$ *pyrG*  $\Delta$ *prtR*::[*pyrG cre*] candidate strains. The left and right panels indicate the result using left and right probe, respectively. Lane 1 and 7; host strain ( $\Delta$ *ligD*::*ptrA*  $\Delta$ *pyrG*), lane 2-4 and 8-10; candidate strains (#1-#3), lane 5 and 6; markers.
- C) Southern blot analysis of the  $\Delta$ *ligD*  $\Delta$ *pyrG*  $\Delta$ *prtR* candidate strains. The left and right panels indicate the result using left and right probe, respectively. Lane 1 and 10; host strains ( $\Delta$ *ligD*::*ptrA*  $\Delta$ *pyrG*  $\Delta$ *prtR*::[*pyrG cre*]), lane 2-4 and 7-9; candidate strains (#1-1-#1-3), lane 5 and 6; markers.
- D) Schematic presentation of *ligD* and *pyrG* complementation to the  $\Delta$ *ligD*  $\Delta$ *pyrG*  $\Delta$ *prtR* strain. The *ptrA* gene in a *ligD* locus was replaced by a DNA fragment carrying the *pyrG* and *ligD* genes in pUC119-*ligD*-*pyrG*. The resulting strain was named  $\Delta$ *prtR*. DNAs of the mutant strains were digested with *PstI* and the target DNA fragment was detected using two probes, the left probe (black box) and the right probe (open box), respectively.
- E) Southern blot analysis of the  $\Delta$ *prtR* candidate strains. The left and right panels indicate the result using left and right probe, respectively. Lane 1, 10, 11, and 20; markers, lane 2, and 12; host strains ( $\Delta$ *ligD*::*ptrA*  $\Delta$ *pyrG*  $\Delta$ *prtR*), lane 3-8 and 13-18; candidate strains (#1-#6), lane 9, and 19; control strains ( $\Delta$ *ligD*::[*pyrG ligD*]  $\Delta$ *pyrG*).



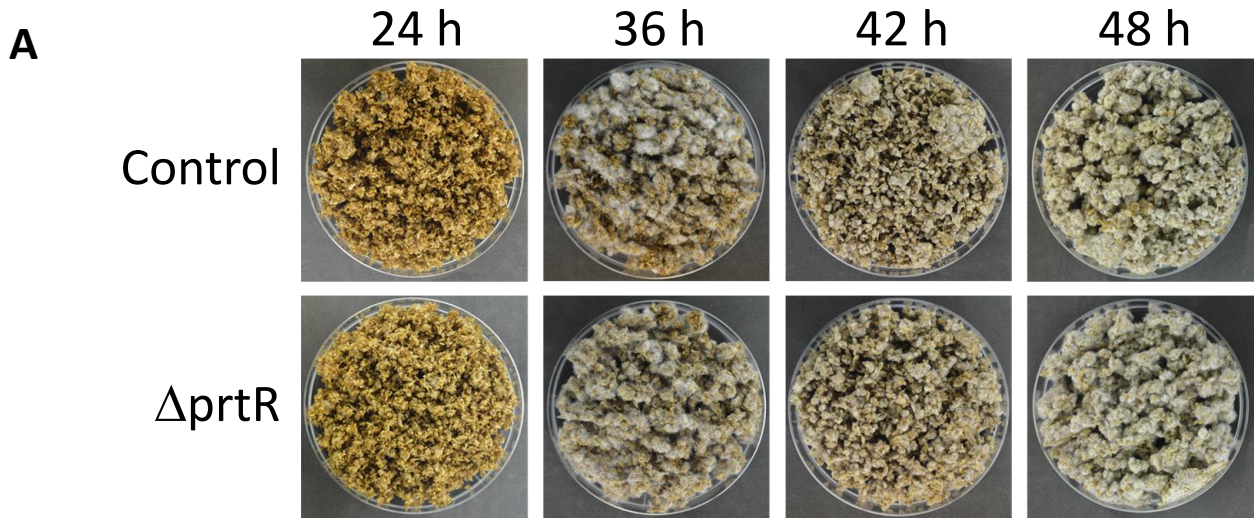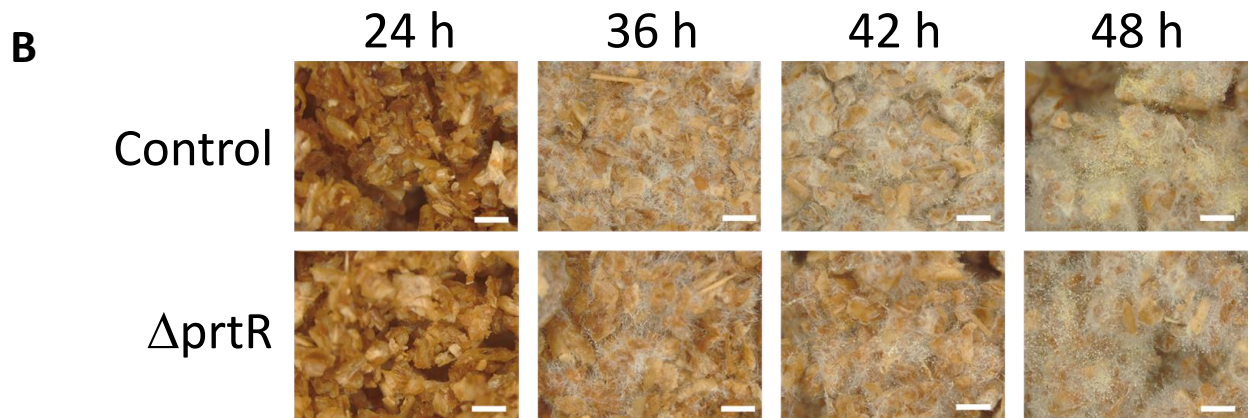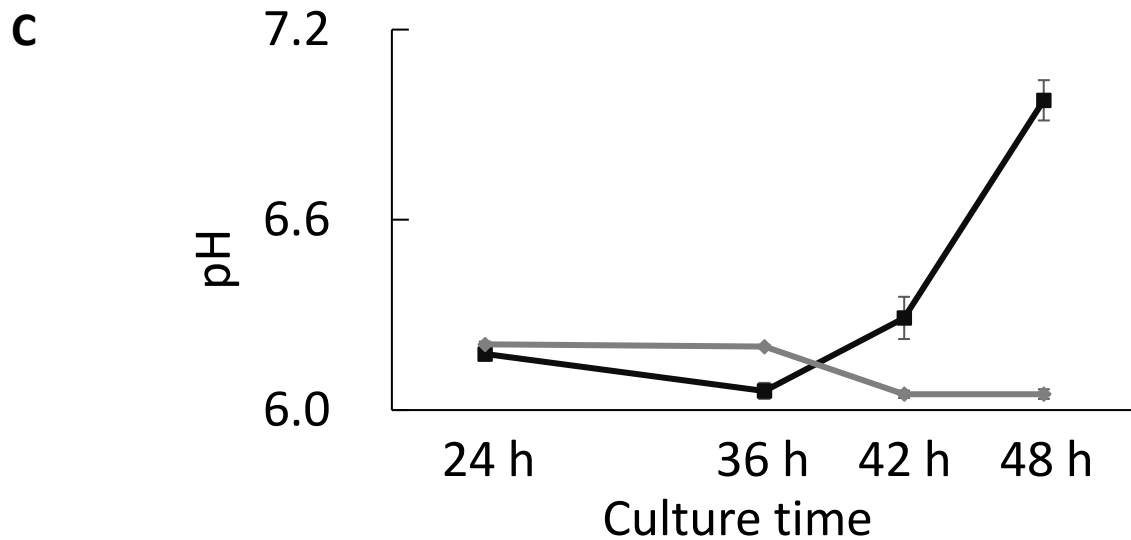

**Fig. S2 The growth of the  $\Delta$ p<sub>prt</sub>R strain on wheat bran as a solid medium.**

A) The growth of the  $\Delta$ p<sub>prt</sub>R strain and the control strain after inoculating  $3 \times 10^7$  of each conidia in 10.2 g of wheat bran and incubating at 30 °C for 24, 36, 42, and 48 h.

B) Enlarged photograph of part of the result shown in A. Bars indicate 2 mm.

C) The pH of the culture medium of the  $\Delta$ p<sub>prt</sub>R strain and the control strain after cultivation on wheat bran. Ten milliliter of water was added to the culture, stirred well, and the pH of the filtrate through Miracloth was measured. Error bars indicate the standard error (n=3). The black bars show the results of the control strain and the gray bars show the results of the  $\Delta$ p<sub>prt</sub>R strain.
